# Supplementary material for: A 4,5-quinolimide-based fluorescent sensor for the turn-on detection of Cd2+with live-cell imaging
Source: Royal Society of Chemistry journal article supplement (doi:10.1039/c7ob00201g), 2017-01-01
Supplement: c7ob00201g1.pdf [file c7ob00201g1.pdf]

## Electronic Supplementary Information

### A 4,5-quinolimide-based fluorescent sensor for the turn-on detection of Cd<sup>2+</sup> with live-cell imaging

Yu Zhang, Xiangfeng Guo,\* Mengmeng Zheng, Rui Yang, Hongming Yang, Lihua Jia\* and Mengmeng Yang

Key Laboratory of Fine Chemicals, College of Heilongjiang Province, Qiqihar University, Qiqihar 161006, China.

\*Corresponding author, E-mail: xfguo@163.com; jlh29@163.com

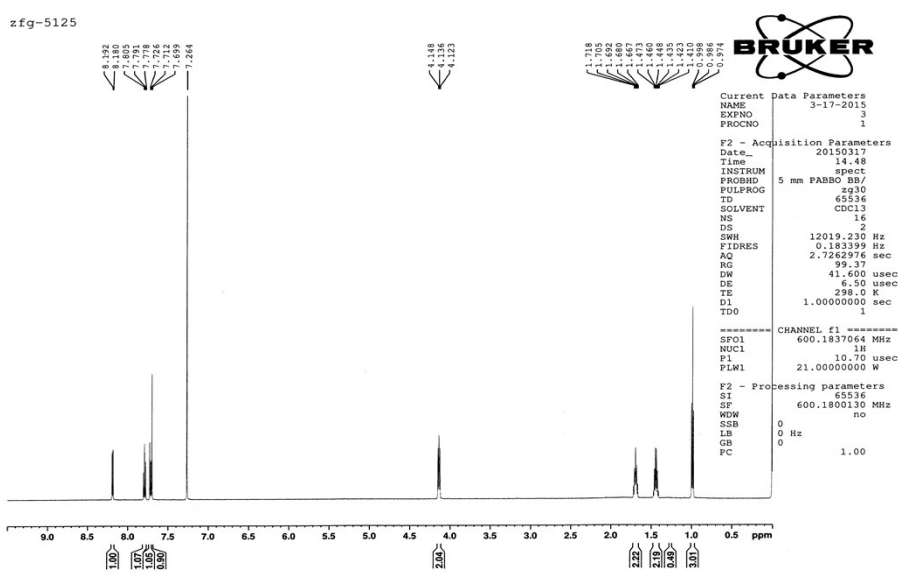

Fig. S1. <sup>1</sup>H NMR (CDCl<sub>3</sub>, 600 MHz) spectrum of **1**.

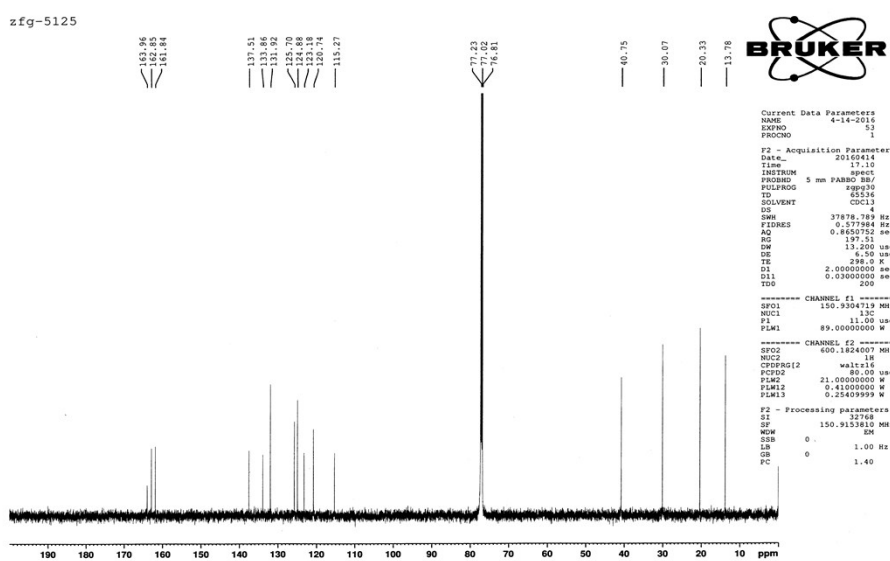

Fig. S2. <sup>13</sup>C NMR (CDCl<sub>3</sub>, 150 MHz) spectrum of **1**.

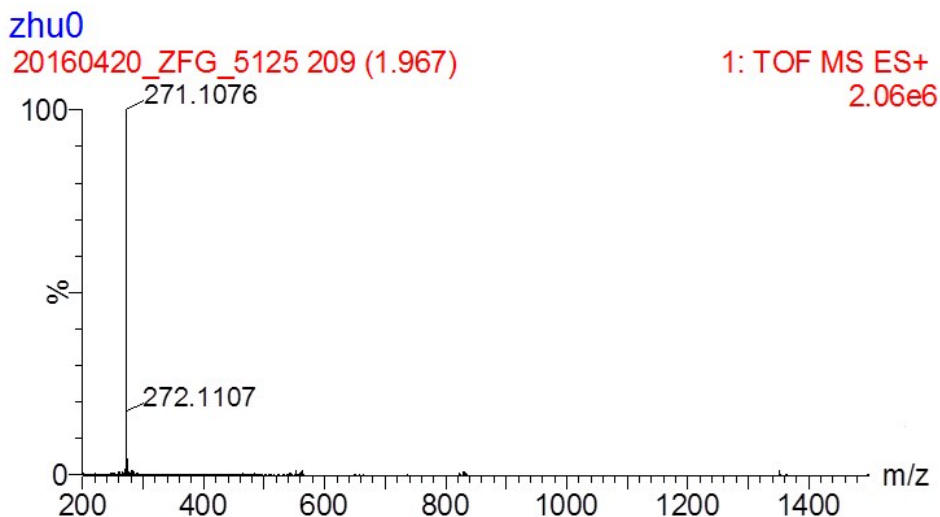

Fig. S3. Mass spectrum of 1.

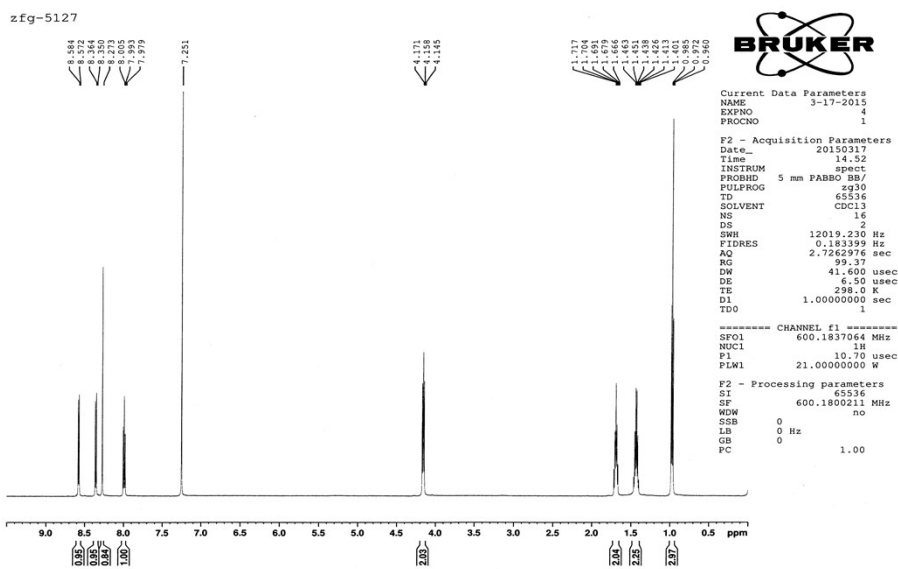

Fig. S4. <sup>1</sup>H NMR (CDCl<sub>3</sub>, 600 MHz) spectrum of 2.

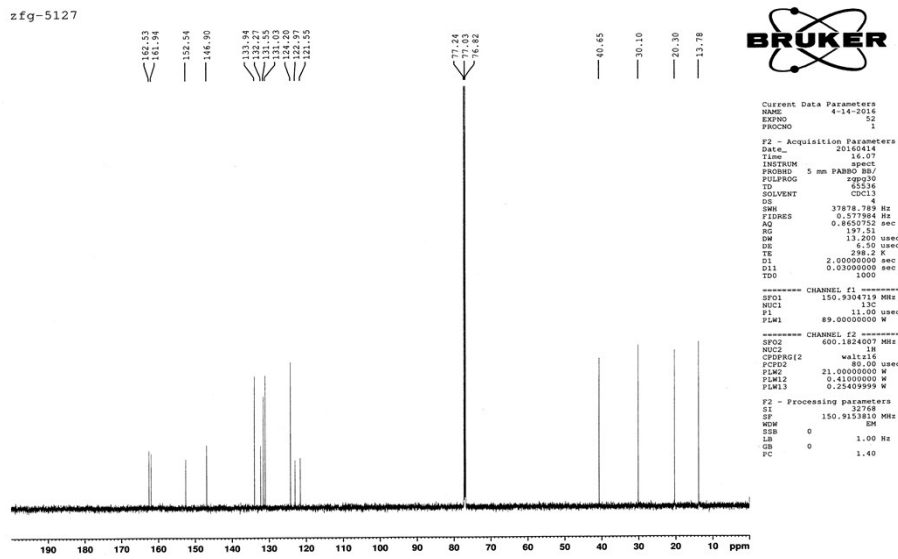

Fig. S5.  $^{13}\text{C}$  NMR ( $\text{CDCl}_3$ , 150 MHz) spectrum of **2**.

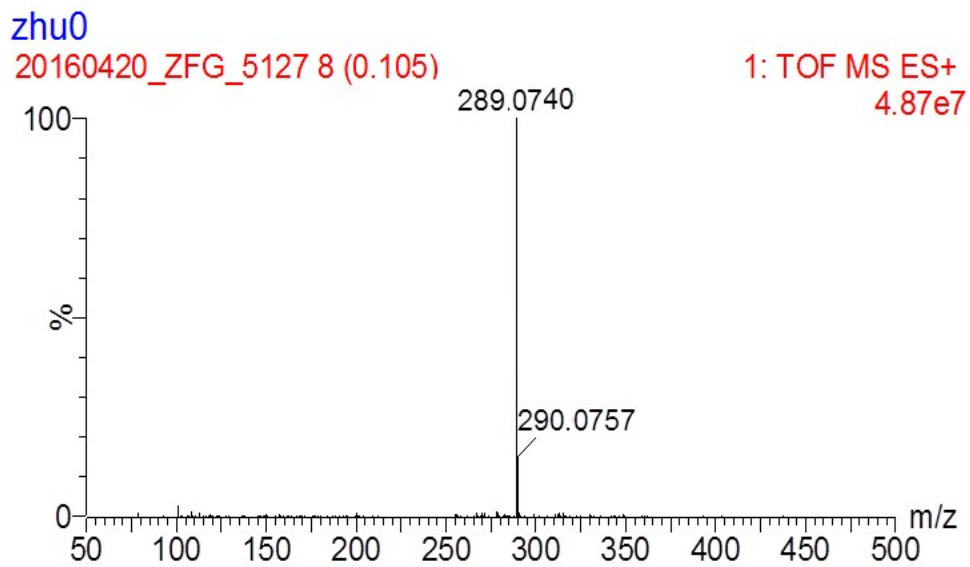

Fig. S6. Mass spectrum of **2**.

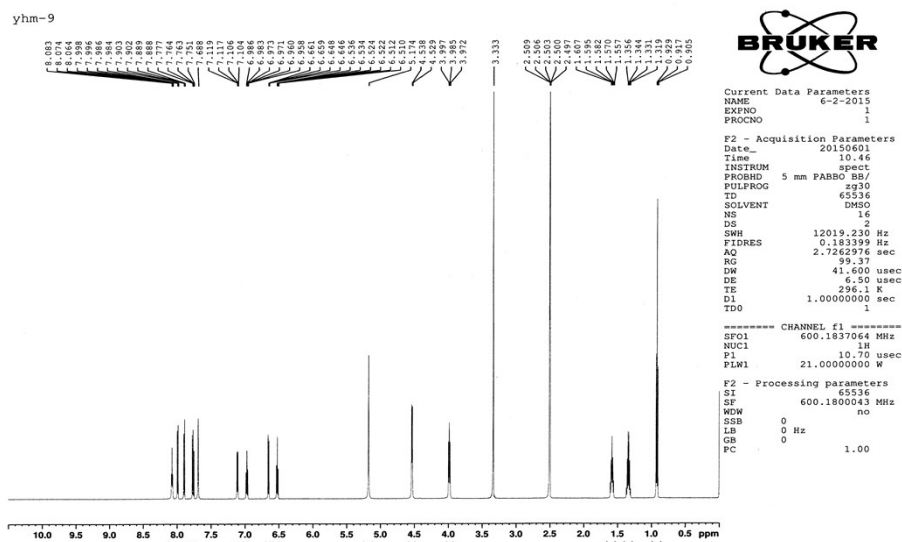

Fig. S7.  $^1\text{H}$  NMR (DMSO- $d_6$ , 600 MHz) spectrum of **3**.

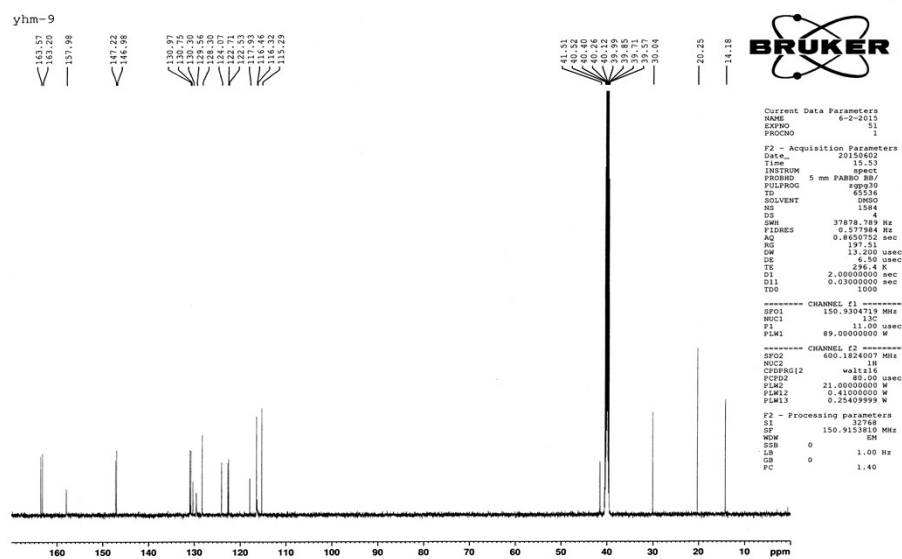

Fig. S8.  $^{13}\text{C}$  NMR (DMSO- $d_6$ , 150 MHz) spectrum of **3**.

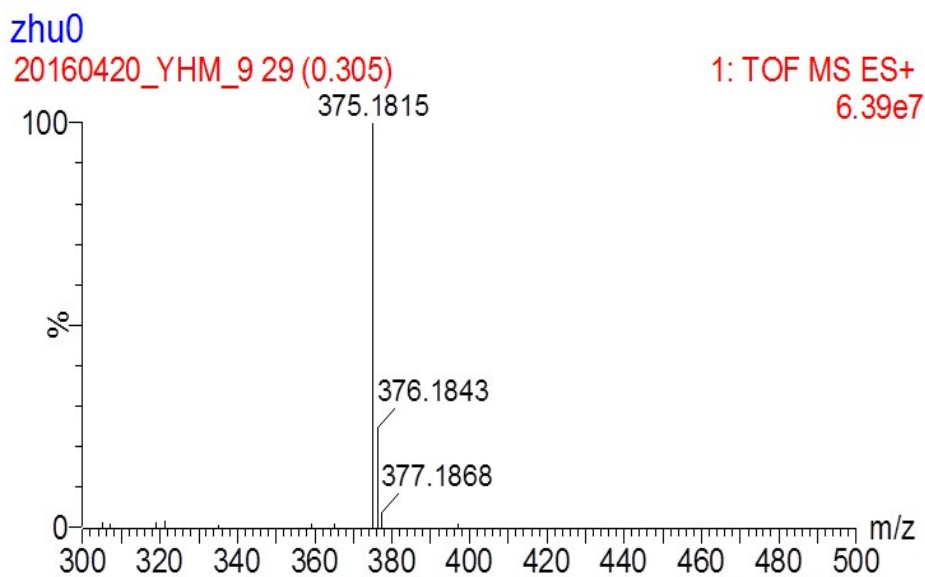

Fig. S9. Mass spectrum of 3.

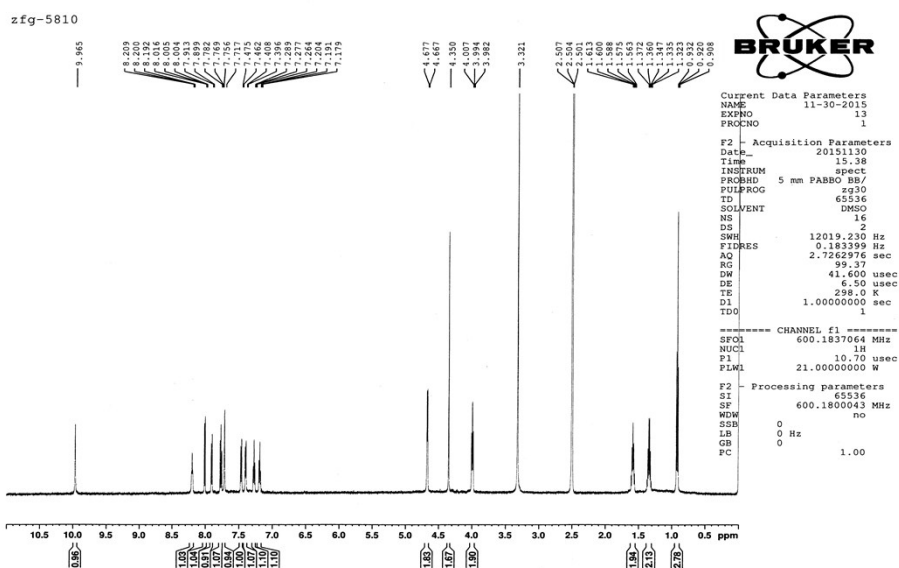

Fig. S10.  $^1\text{H}$  NMR (DMSO- $d_6$ , 600 MHz) spectrum of 4.

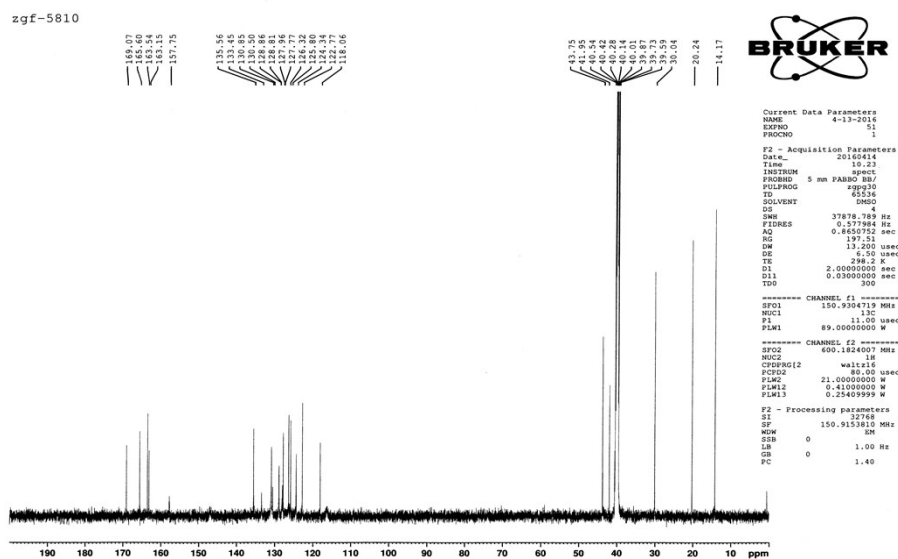

Fig. S11.  $^{13}\text{C}$  NMR ( $\text{DMSO-}d_6$ , 150 MHz) spectrum of 4.

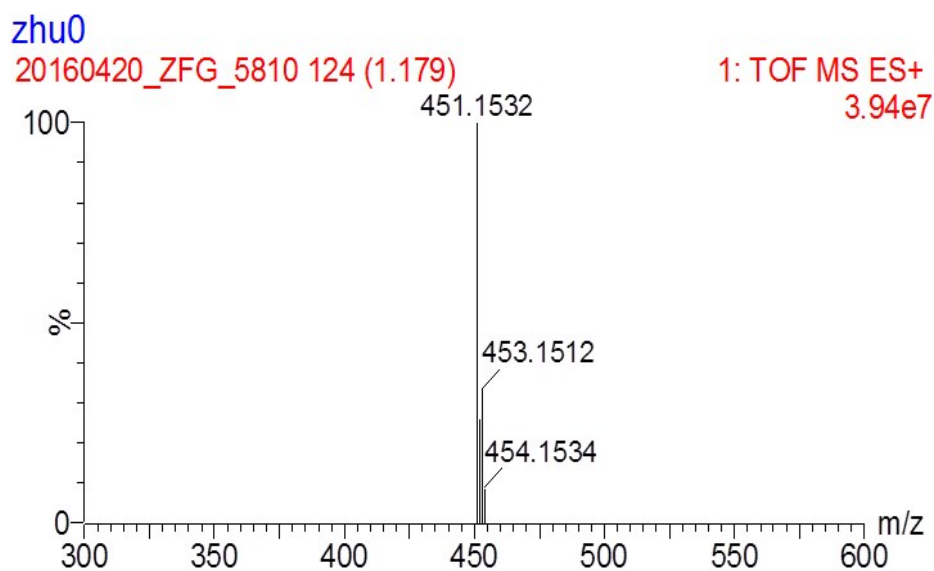

Fig. S12. Mass spectrum of 4.

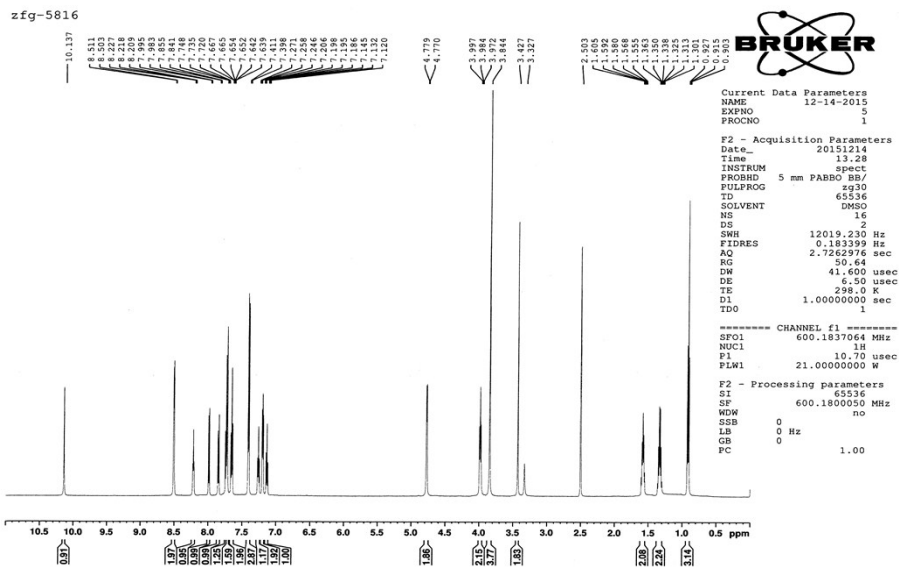

Fig. S13.  $^1\text{H}$  NMR (DMSO- $d_6$ , 600 MHz) spectrum of BNA.

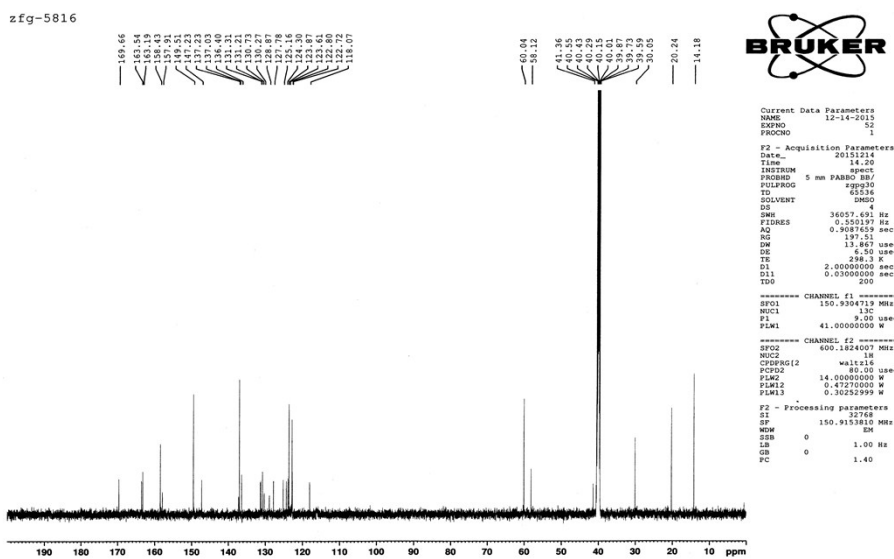

Fig. S14.  $^{13}\text{C}$  NMR (DMSO- $d_6$ , 150 MHz) spectrum of BNA.

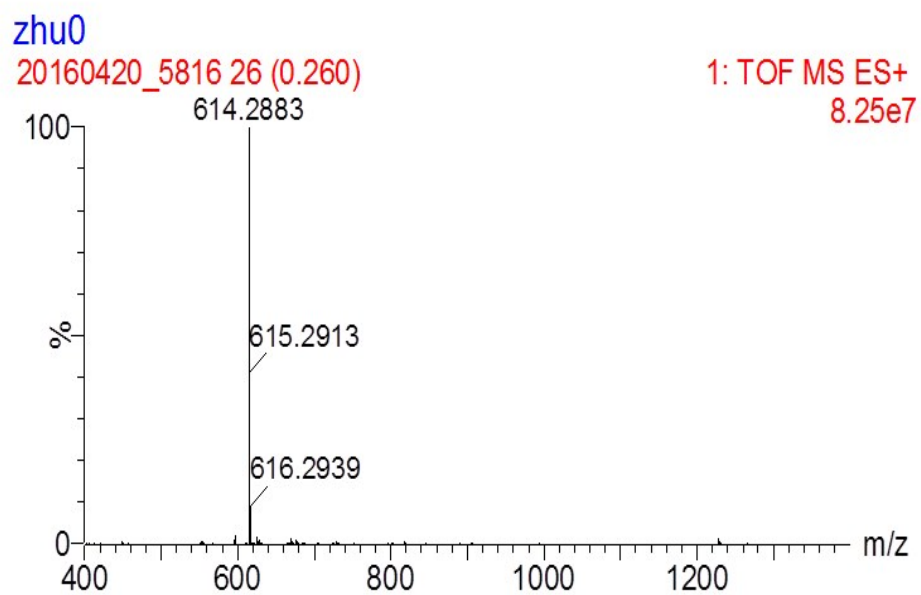

Fig. S15. Mass spectrum of BNA.

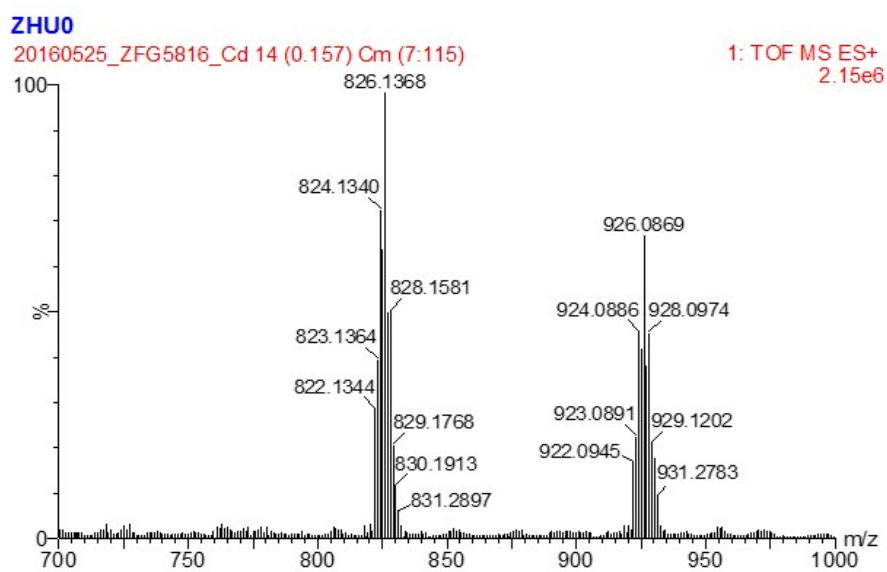

Fig. S16. Mass spectrum of the BNA-Cd<sup>2+</sup> complex.
